# Supplementary material for: Natural polyphenols effects on protein aggregates in Alzheimer's and Parkinson's prion-like diseases
Source: PubMed Central journal article supplement — Neural Regen Res. 2018 Jun;13(6):955–61. doi: 10.4103/1673-5374.233432 (PMC6022479; doi:10.4103/1673-5374.233432), 2018-06
Supplement: NRR-13-955_Suppl1.pdf [file NRR-13-955_Suppl1.pdf]

**Additional Table 1 Natural polyphenols effects in Alzheimer's disease (AD) and Parkinson's disease (PD): *in vitro* and *in vivo* studies cited in the paper.**

| Natural polyphenols                                                                                      | Research models                                                                                                                                          | Doses and effects                                                                                                                                                                                                                                          | References                             |
|----------------------------------------------------------------------------------------------------------|----------------------------------------------------------------------------------------------------------------------------------------------------------|------------------------------------------------------------------------------------------------------------------------------------------------------------------------------------------------------------------------------------------------------------|----------------------------------------|
| <b>Natural polyphenols effects in AD</b>                                                                 |                                                                                                                                                          |                                                                                                                                                                                                                                                            |                                        |
| <i>In vitro</i> studies                                                                                  |                                                                                                                                                          |                                                                                                                                                                                                                                                            |                                        |
| Myricetin, Morin, Quercetin, Kaempferol, (+)-catechin, (-)-epicatechin, Tannic acid                      | Polymerization & destabilization assays (fluorescent spectroscopic analysis)                                                                             | EC <sub>50</sub> : 0.1–1.0 μM<br>Dose-dependently inhibition of fibrillary β-amyloid (fAβ) formation and extension from fresh β-amyloid (Aβ) <sub>1–40</sub> and Aβ <sub>1–42</sub> and dose-dependently destabilization of preformed fAβs.                | Ono et al. (2003)<br>Ono et al. (2004) |
| Resveratrol, Piceid, Resveratrol diglucoside, Piceatannol, Astringin, Viniferin, Curcumin                | Polymerization assays (ultraviolet (UV)-visible measurements and electron microscopy)                                                                    | Resveratrol EC <sub>50</sub> : 5.6 μM; Piceid EC <sub>50</sub> : 4.7 μM<br>Inhibition in Aβ <sub>25–35</sub> fibrils formation stronger with these two polyphenols                                                                                         | Riviere et al. (2007)                  |
| Verbascoside & its esterified derivative                                                                 | Metal-free and metal-induced aggregation <i>in vitro</i> (spectroscopy)                                                                                  | Concentration used: 50 μM<br>Interaction of compounds simultaneously with both Aβ and metal ions. Modulation of the early steps in aggregation of both metal-free Aβ and metal-Aβ. Ability of compounds to disaggregate Cu(II)-Aβ <sub>40</sub> aggregates | Korshavn et al. (2015)                 |
| Resveratrol, trans ε-viniferin                                                                           | Aggregation and disaggregation assays (scanning electron microscopy)                                                                                     | Concentration used: 1 μM<br>Inhibition of Aβ <sub>1–42</sub> aggregation and induction of Aβ <sub>1–42</sub> disaggregation by these polyphenols with better efficiency for trans ε-viniferin                                                              | Vion et al. (2017)                     |
| Resveratrol, ε-viniferin glucoside                                                                       | Aggregation assays (UV-visible measurements)<br>ε-viniferin glucoside/Aβ complex formation assay (ESI mass spectrometric analysis)                       | Concentrations used: 1, 5 and 10 μM<br>Inhibition of Aβ <sub>25–35</sub> , Aβ <sub>1–40</sub> and Aβ <sub>1–42</sub> fibril formation with better efficiency for ε-viniferin glucoside.                                                                    | Richard et al. (2011)                  |
| Rosmarinic acid                                                                                          | Docking stimulation                                                                                                                                      | EC <sub>50</sub> : 20.3 μM<br>Directly interaction of rosmarinic acid with Aβ <sub>1–42</sub>                                                                                                                                                              | Taguchi et al. (2017)                  |
| EGCG                                                                                                     | Synthesis of peptide and <i>in vitro</i> study                                                                                                           | Binding to phosphorylation site of tau and inhibition of its aggregation                                                                                                                                                                                   | Gueroix et al. (2017)                  |
| Cyanine dye family member (C11)                                                                          | Disaggregation assay                                                                                                                                     | Concentration used: 0.001 μM<br>Reduction of aggregated tau levels                                                                                                                                                                                         | Duff et al. (2010)                     |
| GSPE (grape seed-derives polyphenol extract)                                                             | Circular dichroism spectroscopy and electron microscopy                                                                                                  | Potential interference with the assembly of tau peptides into neurotoxic aggregates                                                                                                                                                                        | Wang et al. (2010)                     |
| GSPE                                                                                                     | Study of the effect of GSPE exposure on the ultrastructure of paired helical filaments (PHFs) isolated from AD brain by transmission electron microscopy | Induction of dose- and time-dependent alterations in the morphology of PHFs with partial disintegration of filaments.                                                                                                                                      | Ksiezak-Reding et al. (2012)           |
| Rosmarinic acid                                                                                          | ThT binding fluorescence assay of tau protein                                                                                                            | Concentration used: 10–100 μM<br>Prevention of β-sheet assembly by RA, by direct interaction with tau                                                                                                                                                      | Cornejo et al. (2017)                  |
| <i>In vivo</i> studies                                                                                   |                                                                                                                                                          |                                                                                                                                                                                                                                                            |                                        |
| Curcumin                                                                                                 | Aged APP <sup>swe</sup> Tg2576                                                                                                                           | Chronic curcumin (500 ppm) injection for 5 months<br>Crossing the blood brain barrier by curcumin. Bounding to amyloid plaques. Reduction of amyloid levels and plaques formation                                                                          | Yang et al. (2005)                     |
| Curcumin                                                                                                 | APP(Swe)/PS1dE9                                                                                                                                          | Daily tail vein injections [7.5 mg/kg/day in phosphate-buffered saline (PBS)] for 7 days<br>Crossing the blood brain barrier by curcumin. Labelling senile plaques. Reduction of existing amyloid plaques. Partially restoration of distorted neurites     | Garcia-Alloza et al. (2007)            |
| Polyphenol-rich grape seed extract                                                                       | APP(Swe)/PS1dE9                                                                                                                                          | Feeding during 6 months between 3 and 9 months of age<br>Decrease in Aβ deposition                                                                                                                                                                         | Wang et al. (2009)                     |
| Diets including 0.5% phenolic compounds (Myricetin, nordihydroguaiaretic acid (NDGA) or rosmarinic acid) | Old female APP <sup>swe</sup> Tg2576                                                                                                                     | Feeding during 10 months from the age of 5 months<br>Decrease in amyloid plaques                                                                                                                                                                           | Hamaguchi et al. (2009)                |
| Resveratrol                                                                                              | AD Tg19959 mice                                                                                                                                          | Administration by food during 45 days<br>Decrease in plaque formation in a region specific manner                                                                                                                                                          | Karuppagounder et al. (2009)           |
| GSPE                                                                                                     | TMHT mouse model of AD                                                                                                                                   | Oral administration (200 mg/kg/day)<br>Decrease in the development of AD type tau neuropathology                                                                                                                                                           | Wang et al. (2010)                     |
| EGCG                                                                                                     | Old APP <sup>swe</sup> Tg2576                                                                                                                            | Daily intraperitoneal injections (20 mg/kg) between 12 and 14 months<br>Decrease in insoluble hyperphosphorylated tau in brain                                                                                                                             | Rezaei-Zadeh et al. (2005)             |
| EGCG                                                                                                     | Old APP <sup>swe</sup> Tg2576                                                                                                                            | Oral treatment (50 mg/kg in drinking water) between 12 and 14 months<br>Decrease in insoluble hyperphosphorylated tau in brain                                                                                                                             | Rezaei-Zadeh et al. (2008)             |

## Additional Table 1 Continued.

| Natural polyphenols                                                                                     | Research models                                                                                                                                                      | Doses and effects                                                                                                                                                                                                  | References               |
|---------------------------------------------------------------------------------------------------------|----------------------------------------------------------------------------------------------------------------------------------------------------------------------|--------------------------------------------------------------------------------------------------------------------------------------------------------------------------------------------------------------------|--------------------------|
| <b>Natural polyphenols effects in PD</b>                                                                |                                                                                                                                                                      |                                                                                                                                                                                                                    |                          |
| <i>In vitro</i> studies                                                                                 |                                                                                                                                                                      |                                                                                                                                                                                                                    |                          |
| 13 antioxidants                                                                                         | Formation and destabilization of preformed $\alpha$ -synuclein ( $\alpha$ -syn) fibrils assays (fluorescence spectroscopy with thioflavin S and electron microscopy) | EC <sub>50</sub> : 0.012–18.820 $\mu$ M<br>Anti fibrillogenic and fibril-destabilizing activity                                                                                                                    | Ono and Yamada (2006)    |
| 39 polyphenols including baicalein, delphinidin, gallic acid, gallocatechin gallate and rosmarinic acid | $\alpha$ -syn filament formation assay                                                                                                                               | IC <sub>50</sub> : 2.5–9.8 $\mu$ M<br>Strong inhibition of $\alpha$ -syn filament formation                                                                                                                        | Masuda et al. (2006)     |
| 48 flavonoids belonging to several classes                                                              | $\alpha$ -syn aggregation assay                                                                                                                                      | Concentration used: 50 $\mu$ M<br>Inhibition of the aggregation of $\alpha$ -syn by stabilizing non-pathogenic protein conformation                                                                                | Meng et al. (2010)       |
| 14 polyphenols                                                                                          | $\alpha$ -syn filament formation assay                                                                                                                               | Concentration used: 10–50 $\mu$ M<br>Determination of key molecular scaffolds most effective in inhibiting oligomer formation by $\alpha$ -syn and disaggregating pre-formed oligomers                             | Caruana et al. (2011)    |
| NDGA, morin, baicalein and apigenin                                                                     | Evaluation of protective role against membrane perturbation                                                                                                          | Concentration used: 20 $\mu$ M<br>Strong protection against membrane perturbation induced by aggregated WT and mutant $\alpha$ -syn                                                                                | Caruana et al. (2012)    |
| Baicalein                                                                                               | Study of aggregation inhibition mechanism                                                                                                                            | Concentration used: 50 $\mu$ M<br>Formation of Schiffbase                                                                                                                                                          | Meng et al. (2009)       |
| Baicalein                                                                                               | Study of aggregation inhibition mechanism (circular dichroism and fourier transform infra red analysis)                                                              | Concentration used: 100 $\mu$ M<br>Stabilization of oligomers by $\beta$ -sheet enrichment                                                                                                                         | Hong et al. (2008)       |
| Curcumin and curcumin derivatives                                                                       | $\alpha$ -syn aggregation and neurotoxicity assays (Biophysical, imaging techniques, dot blot and cell based assays)                                                 | Concentration used: 210 $\mu$ M<br>Inhibition of $\alpha$ -syn aggregation and reduction of $\alpha$ -syn associated neurotoxicity by curcumin pyrazole derivatives                                                | Ahsan et al. (2015)      |
| EGCG                                                                                                    | Binding and cytotoxicity assays                                                                                                                                      | Concentration used: 100 $\mu$ M<br>Binding of EGCG to the natively unfolded polypeptides, forming complexes and decreasing their cytotoxicity                                                                      | Ehrnhoefer et al. (2008) |
| EGCG                                                                                                    | Binding and cytotoxicity assays                                                                                                                                      | Concentrations used: 0.2–6.0 $\mu$ M<br>Binding of EGCG to the oligomeric state of $\alpha$ -syn, destabilization of it and decreasing its cytotoxicity                                                            | Lorenzen et al. (2014)   |
| EGCG                                                                                                    | Cytotoxicity assays                                                                                                                                                  | Concentrations used: 10, 30, 50 and 70 $\mu$ M<br>Facilitation of the conversion of “active” oligomers into fibrils                                                                                                | Yang et al. (2017)       |
| Gallic acid                                                                                             | Oligomers formation assay                                                                                                                                            | Concentration used: 40 $\mu$ M<br>Inhibition of fibrils of $\alpha$ -syn formation and reduction of formation of oligomers rate by binding to soluble and non-toxic oligomers and stabilization of their structure | Liu et al. (2014)        |
| Piceatannol                                                                                             | $\alpha$ -syn fibrils formation and destabilization of preformed filaments assays, toxicity assay in cellular model                                                  | Concentrations used: 100 and 200 $\mu$ M<br>Inhibition of $\alpha$ -syn fibrils formation and destabilization of preformed filaments. Protection of PC12 against $\alpha$ -syn-induced toxicity                    | Temsamani et al. (2016)  |
| Resveratrol                                                                                             | $\alpha$ -syn assay, toxicity assay in cellular model                                                                                                                | Concentration used: 7.5 $\mu$ M<br>Protection of SK-N-BE from the toxicity arising from aggregation-prone protein $\alpha$ -syn(A30P)                                                                              | Albani et al. (2009)     |
| Resveratrol                                                                                             | $\alpha$ -syn-expressing PC12 cell lines<br>Pharmacological induction of autophagy by resveratrol                                                                    | Concentration used: 50 $\mu$ M<br>Increase degradation of $\alpha$ -syn                                                                                                                                            | Wu et al. (2011)         |
| Curcumin analog                                                                                         | Synphilin-1 aggregation assay in a cellular model (SHSY-5Y cells)                                                                                                    | Concentration used: 1 $\mu$ M<br>Decrease in synphilin-1 aggregation by preventing covalent modifications and by maintaining the expression of the protein disulfide isomerase                                     | Pal et al. (2011)        |

EC<sub>50</sub>: Concentration for 50% of maximal effect; EGCG: epigallocatechin 3-gallate.
